# Supplementary material for: Multimodal Imaging-Based Interpretable Radiomics for Differentiating Brucella and Tuberculosis Spondylitis: A Two-Center Study
Source: Research Square preprint supplement (doi:10.21203/rs.3.rs-5913651/v1), 2025-02-04
Supplement: Supplementary file 1 [file 7c54c4eeeccb8fd702543a42.docx]

[Table S1](https://cdn.amegroups.cn/static/public/TLCR-24-565-Supplementary.pdf" \t "https://pmc.ncbi.nlm.nih.gov/articles/PMC11736589/_blank).Features for CT,T1WI,T2WI and FS T2WI model

| Features |
| --- |
| exponential_glrlm_LongRunLowGrayLevelEmphasis_CT |
| log-sigma-1-0-mm-3D_firstorder_Kurtosis_CT |
| exponential_glrlm_RunVariance_T2 |
| wavelet-HLL_firstorder_RootMeanSquared_CT |
| log-sigma-3-0-mm-3D_glszm_LargeAreaHighGrayLevelEmphasis_T2 |
| original_shape_MinorAxisLength_CT |
| log-sigma-5-0-mm-3D_gldm_LargeDependenceHighGrayLevelEmphasis_T2FSE |
| log-sigma-3-0-mm-3D_gldm_DependenceVariance_T2FSE |
| log-sigma-5-0-mm-3D_firstorder_Kurtosis_CT |
| log-sigma-1-0-mm-3D_glrlm_ShortRunHighGrayLevelEmphasis_T1 |
| squareroot_firstorder_Kurtosis_CT |
| squareroot_firstorder_10Percentile_T2FSE |
| logarithm_firstorder_Skewness_T2FSE |
| lbp-3D-m1_glrlm_GrayLevelNonUniformityNormalized_T2FSE |
| squareroot_firstorder_Skewness_CT |
| squareroot_glcm_ClusterShade_T2 |
| squareroot_glszm_ZoneEntropy_CT |
| log-sigma-5-0-mm-3D_gldm_DependenceVariance_T2 |
| log-sigma-5-0-mm-3D_glrlm_LongRunHighGrayLevelEmphasis_CT |
| wavelet-LHL_firstorder_Range_T2FSE |
| wavelet-HLH_glszm_ZoneEntropy_T2 |
| wavelet-HHL_glszm_ZoneEntropy_T1 |
| logarithm_glszm_GrayLevelVariance_CT |
| squareroot_gldm_LargeDependenceHighGrayLevelEmphasis_CT |
| squareroot_glcm_ClusterShade_T1 |
| square_gldm_DependenceVariance_T2 |
| wavelet-HLL_glszm_HighGrayLevelZoneEmphasis_CT |
| wavelet-LHL_gldm_LargeDependenceHighGrayLevelEmphasis_T2FSE |
| exponential_firstorder_Minimum_CT |
| wavelet-LHL_firstorder_Skewness_CT |
| wavelet-LHL_gldm_LargeDependenceHighGrayLevelEmphasis_CT |
| wavelet-HLL_glcm_ClusterShade_T1 |
| exponential_glcm_Correlation_CT |
| original_firstorder_10Percentile_T2 |
| squareroot_firstorder_10Percentile_T2 |
| wavelet-LHL_firstorder_Median_T1 |
| logarithm_glszm_SizeZoneNonUniformityNormalized_CT |
| exponential_glszm_ZoneVariance_CT |
| wavelet-HLH_glszm_ZoneEntropy_T2FSE |
| log-sigma-5-0-mm-3D_firstorder_Maximum_CT |
| exponential_glszm_LowGrayLevelZoneEmphasis_T2FSE |
| log-sigma-3-0-mm-3D_firstorder_Skewness_T1 |
| wavelet-HLL_firstorder_Skewness_T2FSE |
| wavelet-LHH_glszm_ZoneEntropy_T2FSE |
| wavelet-LHL_firstorder_Mean_T1 |
| wavelet-LHL_gldm_LargeDependenceHighGrayLevelEmphasis_T2 |
| wavelet-HLH_gldm_DependenceVariance_CT |
| log-sigma-4-0-mm-3D_firstorder_RootMeanSquared_T2 |
| log-sigma-1-0-mm-3D_glszm_HighGrayLevelZoneEmphasis_CT |
| wavelet-LLH_glcm_Imc2_CT |
| square_gldm_DependenceNonUniformityNormalized_T1 |
| exponential_ngtdm_Strength_CT |
| log-sigma-3-0-mm-3D_ngtdm_Busyness_T1 |
| square_glrlm_RunVariance_T2 |
| wavelet-LHL_glrlm_RunEntropy_CT |
| wavelet-LHL_glszm_LargeAreaLowGrayLevelEmphasis_T1 |
| original_firstorder_Minimum_T2 |
| wavelet-HLH_firstorder_Minimum_T2FSE |
| exponential_ngtdm_Busyness_CT |
| log-sigma-1-0-mm-3D_gldm_LargeDependenceLowGrayLevelEmphasis_T1 |
| wavelet-HLL_gldm_DependenceVariance_CT |
| original_firstorder_10Percentile_CT |
| wavelet-LHH_ngtdm_Busyness_CT |
| wavelet-HLH_glcm_ClusterProminence_T2 |
| wavelet-HLH_firstorder_Median_CT |
| wavelet-HLL_firstorder_Skewness_T2 |
| wavelet-LHH_ngtdm_Busyness_T1 |
| exponential_glszm_SmallAreaEmphasis_CT |
| wavelet-LLH_glcm_Imc1_CT |
| wavelet-HLL_ngtdm_Busyness_CT |
| wavelet-HHL_gldm_DependenceVariance_CT |
| wavelet-HLH_glcm_ClusterProminence_T1 |
| exponential_ngtdm_Coarseness_CT |
| square_firstorder_Skewness_T1 |
| original_glszm_LargeAreaHighGrayLevelEmphasis_T2 |
| exponential_glcm_MCC_T1 |
| wavelet-LLL_glszm_LargeAreaHighGrayLevelEmphasis_T1 |
| wavelet-LLH_glcm_Correlation_CT |
| wavelet-LHL_glcm_Imc2_T1 |
| wavelet-HLL_glcm_Imc2_CT |


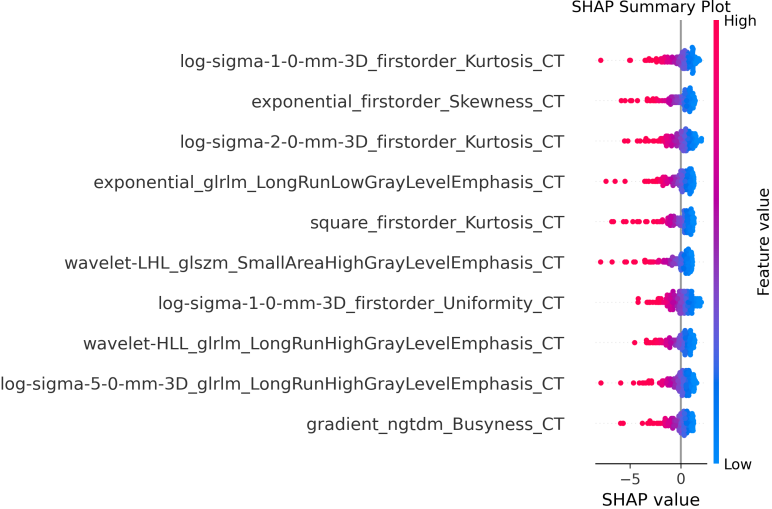


Fig s1.SHAP summary plot for CT model


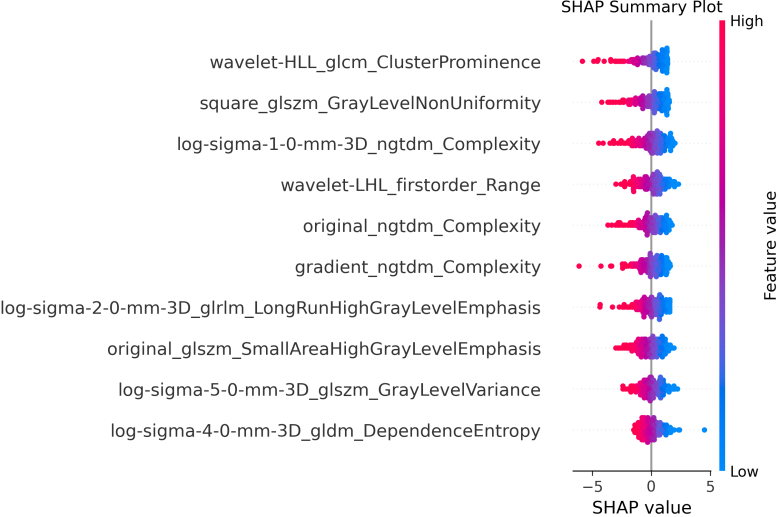


Fig s2.SHAP summary plot for T1WI model


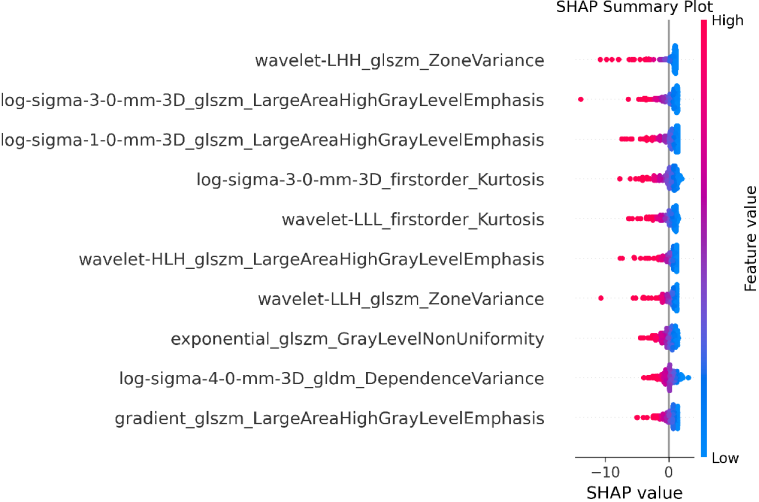


Fig s3.SHAP summary plot for T2WI model


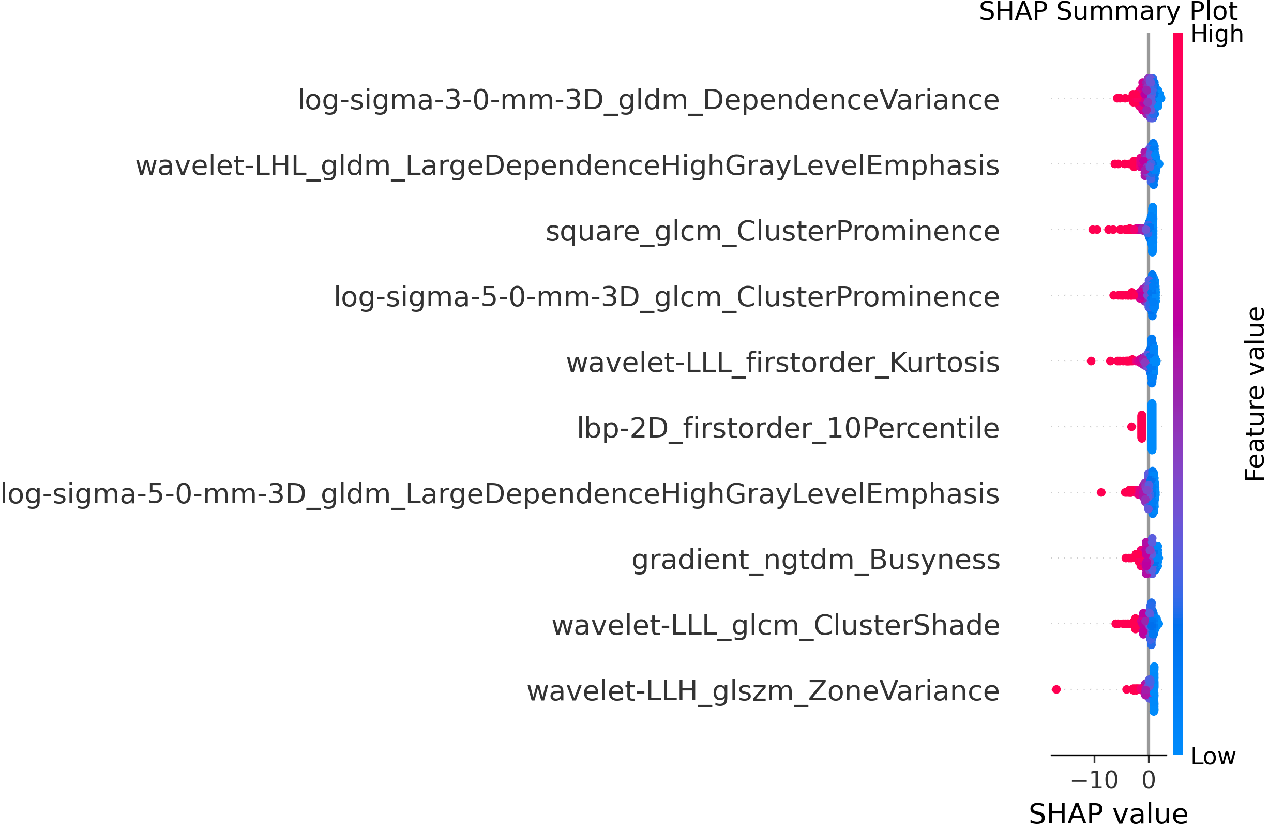


Fig s4.SHAP summary plot for FS T2WI model


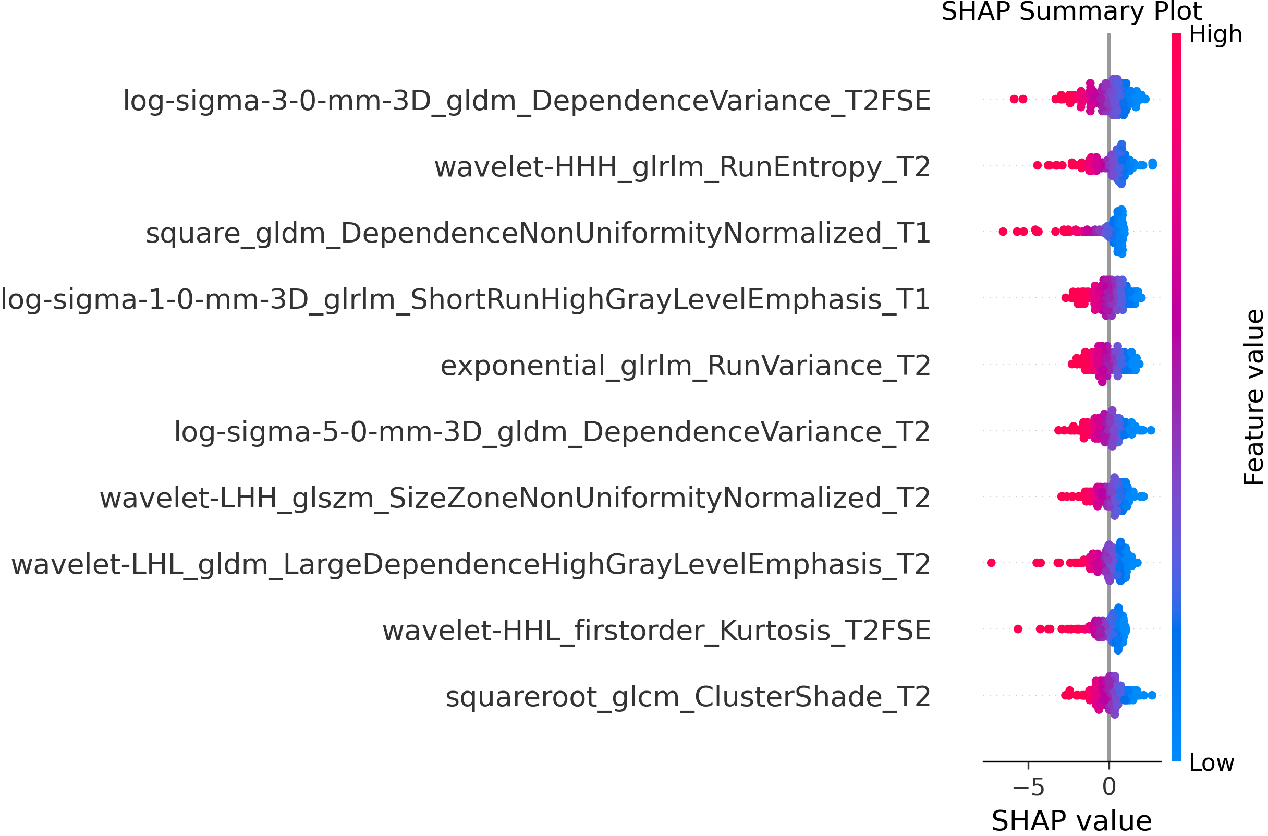


Fig s5.SHAP summary plot for T1WI,T2WI and FS T2WI model


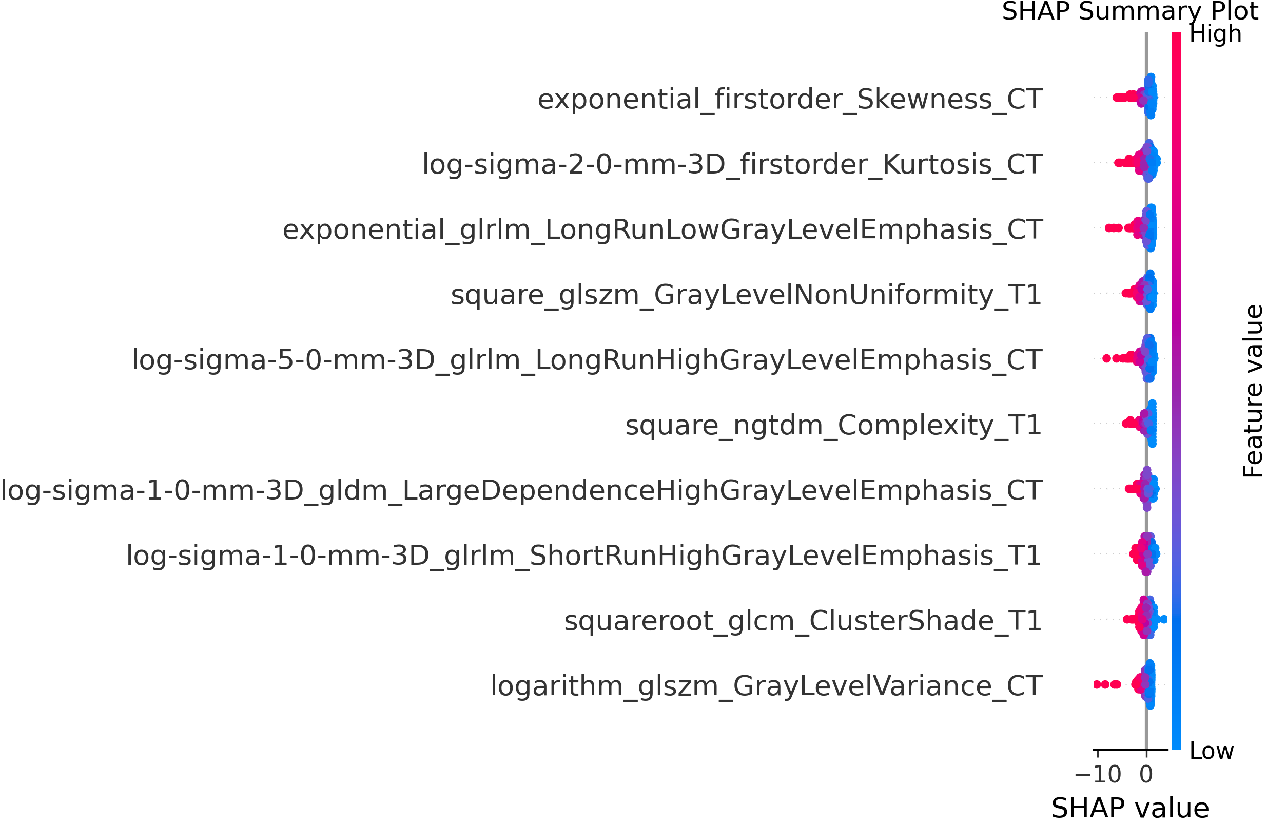


Fig s6.SHAP summary plot for CT and T1WI model


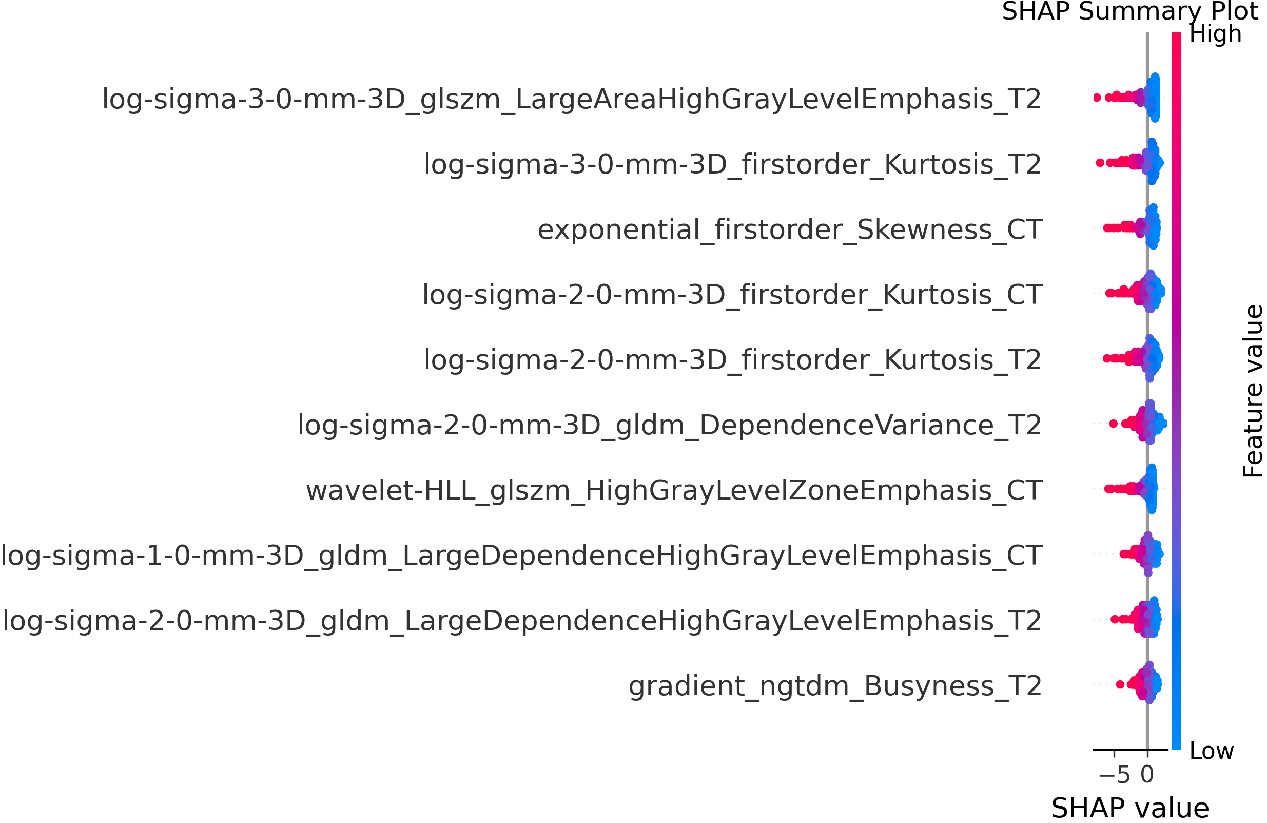


Fig s7.SHAP summary plot for CT and T2WI model


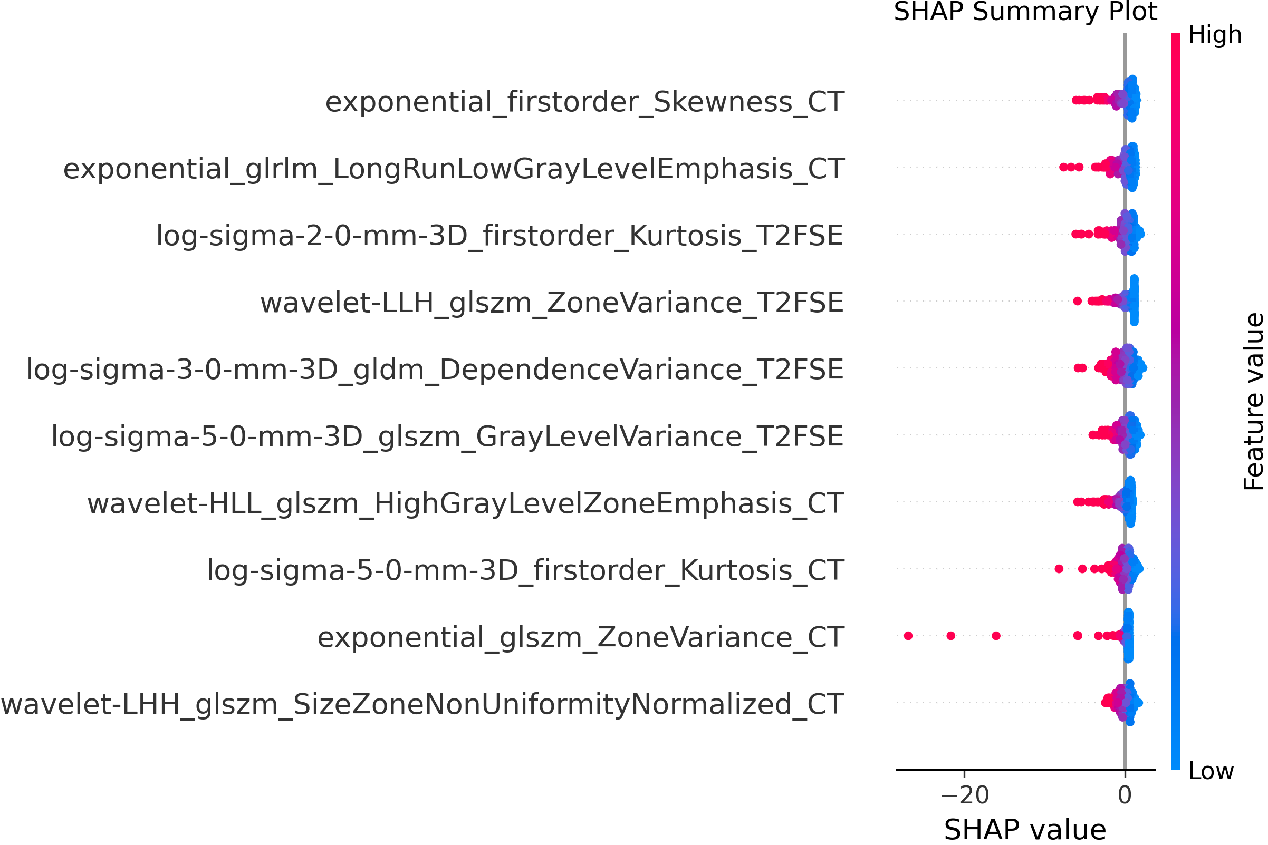


Fig s8.SHAP summary plot for CT and FS T2WI model
